# Supplementary material for: Asymmetric side-chain engineering of conjugated polymers with improved performance and stability in organic electrochemical transistors
Source: Royal Society of Chemistry journal article supplement (doi:10.1039/d4tc02135e), 2024-01-01
Supplement: d4tc02135e1.pdf [file d4tc02135e1.pdf]

## Supporting Information

### **Asymmetric Side-Chain Engineering of Conjugated Polymers with Improved Performance and Stability in Organic Electrochemical Transistors**

Guo-Hao Jiang,<sup>a</sup> Chia-Ying Li,<sup>a</sup> Shang-Wen Su,<sup>a</sup> Yan-Cheng Lin,<sup>a,b,\*</sup>

<sup>a</sup>Department of Chemical Engineering, National Cheng Kung University, Tainan City  
70101, Taiwan.

<sup>b</sup>Advanced Research Center for Green Materials Science and Technology, National  
Taiwan University, Taipei 10617, Taiwan.

\*Corresponding authors. E-mail: ycl@gs.ncku.edu.tw (Y.-C. L.)

**Table S1.** Optical and electrochemical parameters of the polymer films.

| Polymer                        | P(C,C) | P(C,O) | P(O,O) |
|--------------------------------|--------|--------|--------|
| $\lambda_{\max}$ (nm)          | 703    | 710    | 718    |
| (0-0 / 0-1)                    | 0.767  | 0.806  | 0.847  |
| E <sub>g</sub> (eV)            | 1.64   | 1.61   | 1.58   |
| HOMO (eV)                      | -5.52  | -5.31  | -5.08  |
| LUMO (eV)                      | -3.88  | -3.70  | -3.50  |
| $\Delta E_{\text{onset}}$ (eV) | 0.202  | 0.606  | 0.695  |

**Table S2.** GIXD crystallographic parameters of the as-cast and electrolyte-swelled polymer films derived from the OOP line-cutting profiles.

| OOP             | As-cast |        |        | Swelled |        |        |
|-----------------|---------|--------|--------|---------|--------|--------|
|                 | P(C,C)  | P(C,O) | P(O,O) | P(C,C)  | P(C,O) | P(O,O) |
| $d_{200}$ (Å)   | 12.04   | 12.91  | 11.61  | 12.09   | 12.91  | 12.09  |
| FWHM (Å)        | 0.089   | 0.063  | 0.054  | 0.092   | 0.067  | 0.040  |
| $L_{c,200}$ (Å) | 63.25   | 90.05  | 104.53 | 61.80   | 83.89  | 139.97 |
| $g_{200}$       | 0.183   | 0.159  | 0.140  | 0.186   | 0.165  | 0.123  |

**Table S3.** GIXD crystallographic parameters of the as-cast and electrolyte-swelled polymer films derived from the IP line-cutting profiles.

| IP              | As-cast |        |        | Swelled |        |        |
|-----------------|---------|--------|--------|---------|--------|--------|
|                 | P(C,C)  | P(C,O) | P(O,O) | P(C,C)  | P(C,O) | P(O,O) |
| $d_{010}$ (Å)   | -       | 3.55   | 3.65   | -       | 3.55   | 3.67   |
| FWHM (Å)        | -       | 0.089  | 0.104  | -       | 0.091  | 0.098  |
| $L_{c,010}$ (Å) | -       | 63.54  | 54.37  | -       | 62.14  | 57.70  |
| $g_{010}$       | -       | 0.099  | 0.109  | -       | 0.100  | 0.106  |

**Table S4.** GIXD crystallographic parameters of the as-cast and electrolyte-swelled polymer films derived from the geometrically corrected azimuthal integral profiles.

|                       | As-cast |        |        | Swelled |        |        |
|-----------------------|---------|--------|--------|---------|--------|--------|
|                       | P(C,C)  | P(C,O) | P(O,O) | P(C,C)  | P(C,O) | P(O,O) |
| <b>OOP area</b>       | 2.292   | 4.012  | 12.837 | 4.999   | 6.858  | 15.2   |
| <b>IP area</b>        | 0.322   | 0.378  | 0.256  | 0.803   | 0.152  | 0.178  |
| <b>OOP / (IP+OOP)</b> | 0.877   | 0.914  | 0.980  | 0.862   | 0.978  | 0.988  |
| <b>rDOC (%)</b>       | 15.1    | 26.4   | 84.5   | 32.9    | 45.1   | 100.0  |

**Scheme S1.** Synthetic routes of the side chains, isoindigo monomers, and P(C,O) with asymmetric side chains.

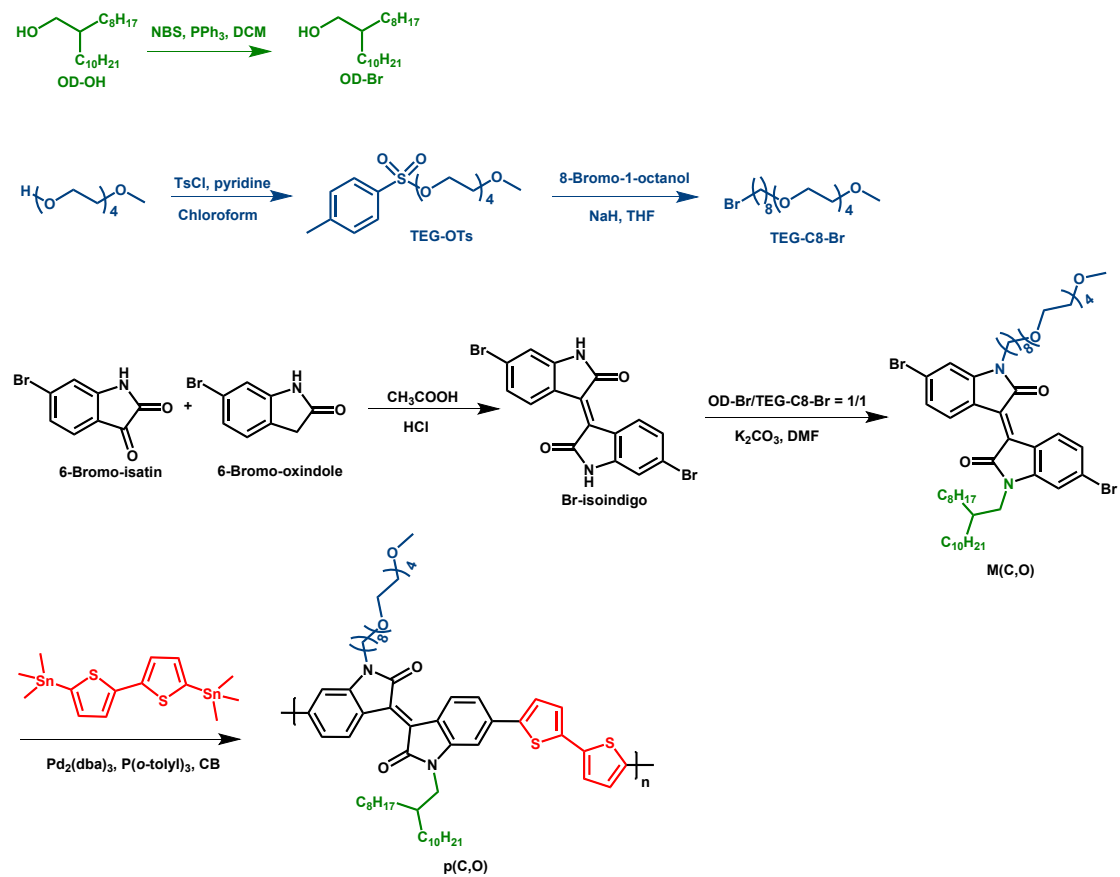

a)

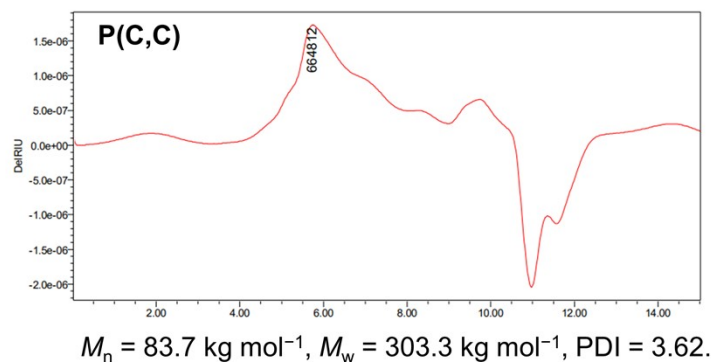

b)

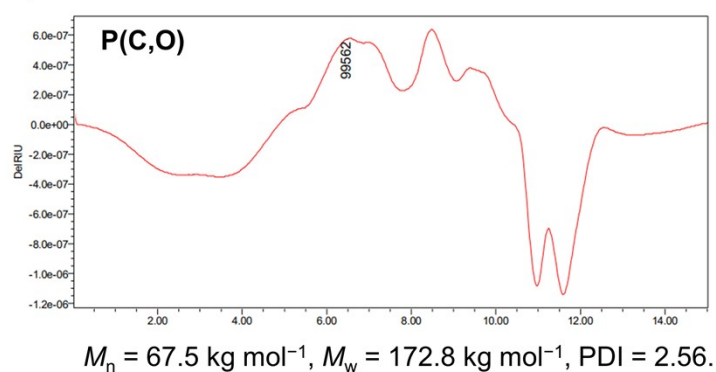

c)

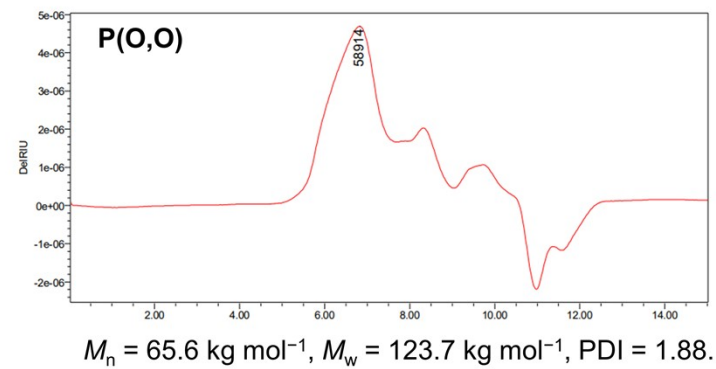

**Fig. S1.** GPC curves of (a) P(C,C), (b) P(C,O), and (c) P(O,O).

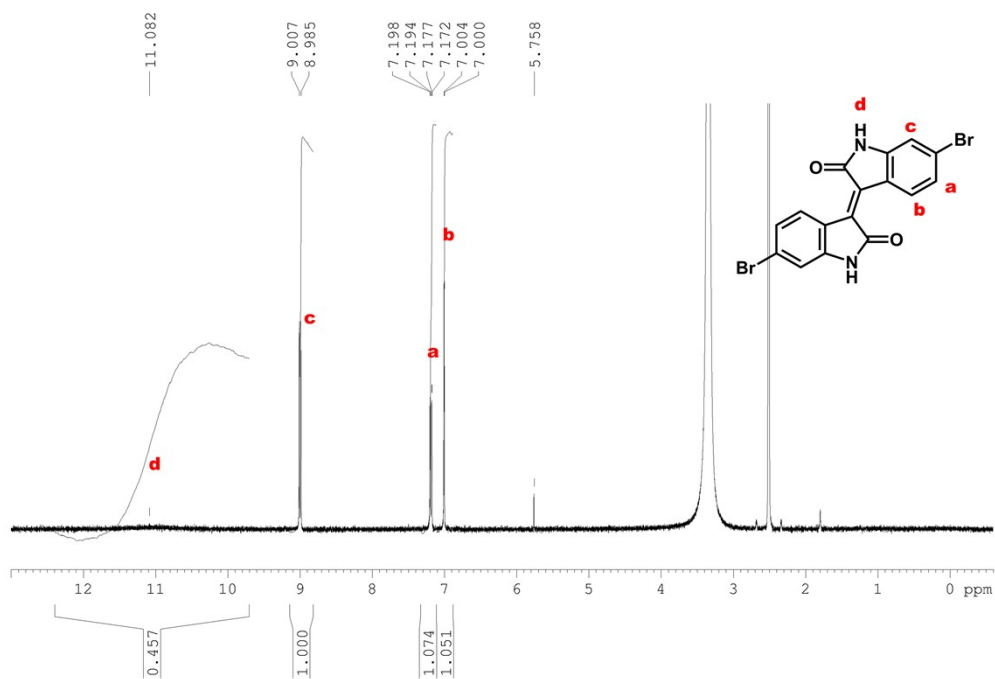

**Fig. S2.**  $^1\text{H}$  NMR spectrum of **Br-isoindigo** in  $d_6$ -DMSO.

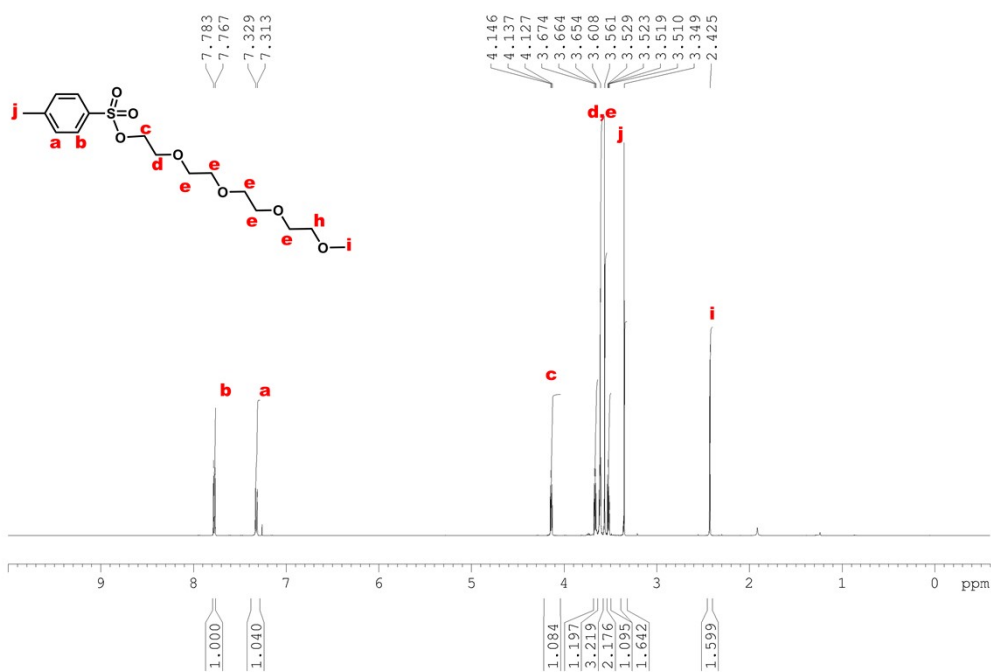

**Fig. S3.**  $^1\text{H}$  NMR spectrum of **TEG-OTs** in  $\text{CdCl}_3$ .

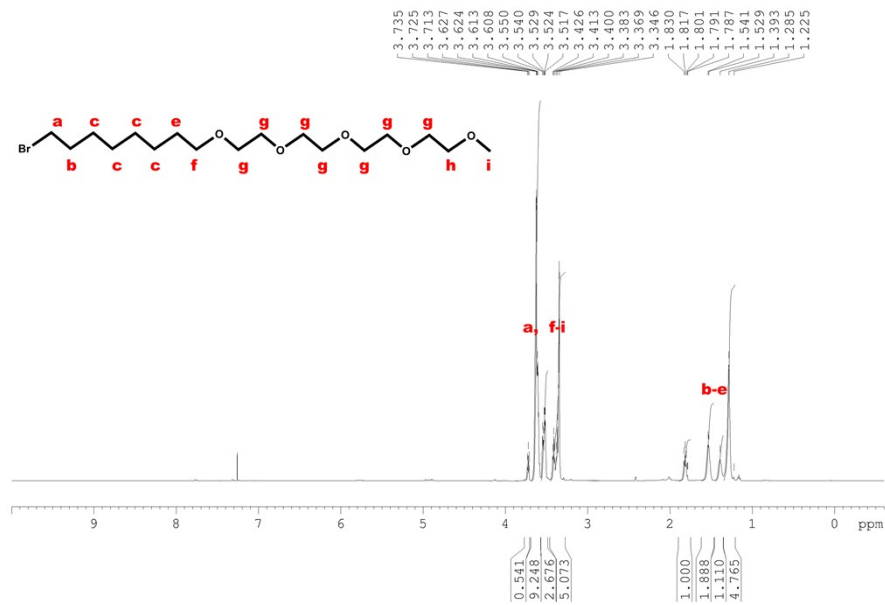

Fig. S4.  $^1\text{H}$  NMR spectrum of TEG-C8-Br in  $\text{CdCl}_3$ .

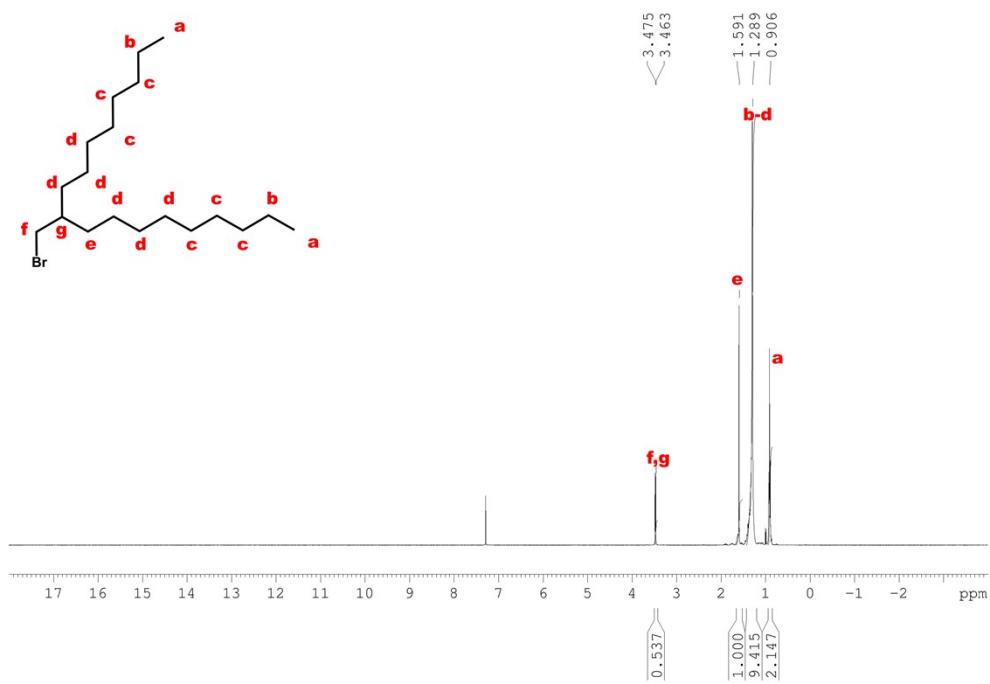

Fig. S5.  $^1\text{H}$  NMR spectrum of OD-Br in  $\text{CdCl}_3$ .

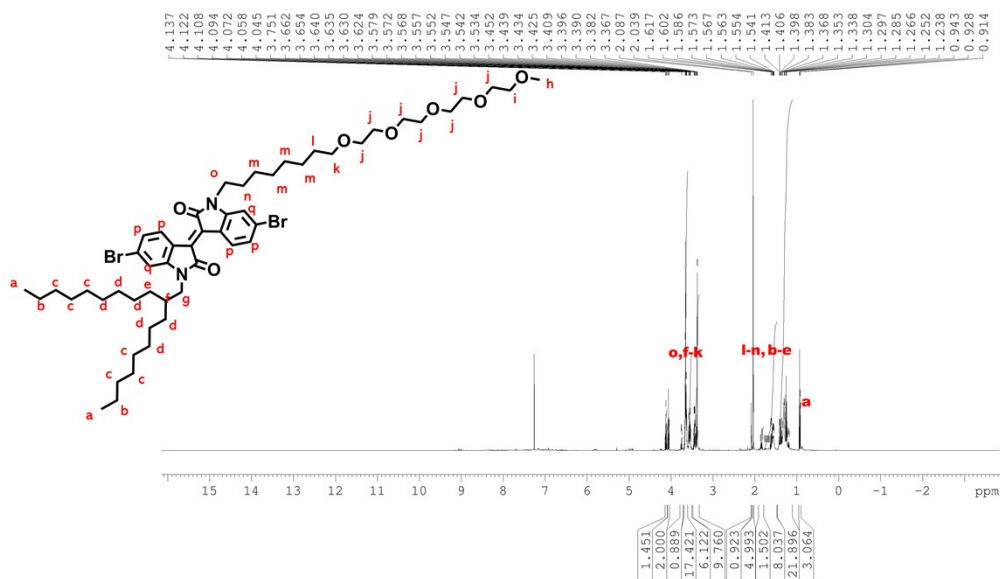

**Fig. S6.**  $^1\text{H}$  NMR spectrum of **M(C,O)** in  $\text{CdCl}_3$ .

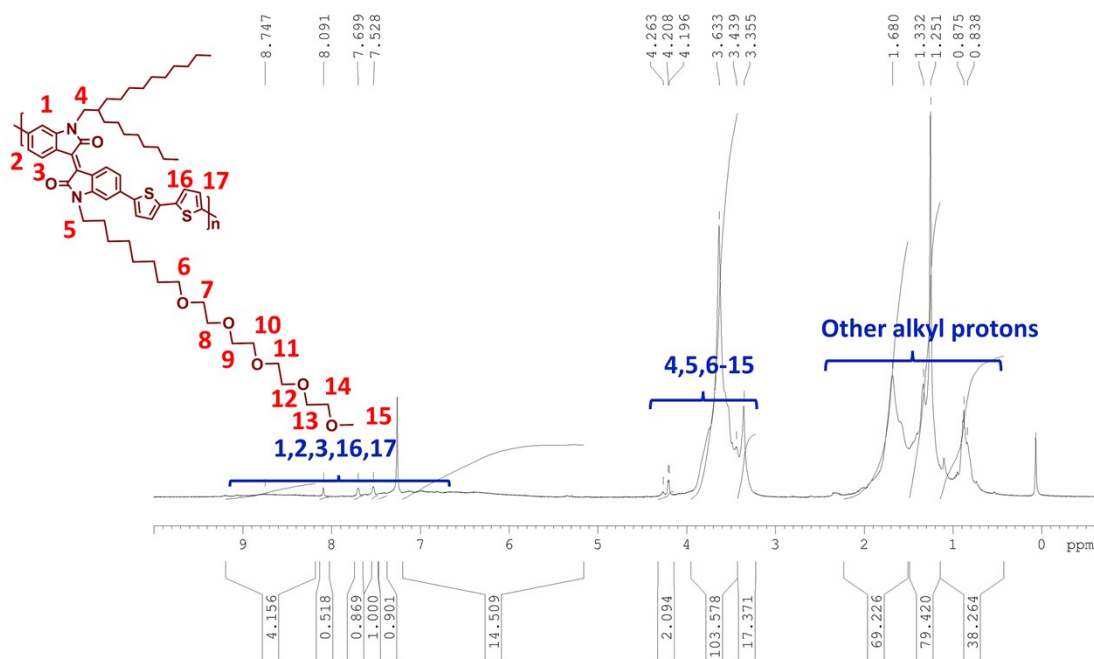

**Fig. S7.**  $^1\text{H}$  NMR spectrum of **P(C,O)** in  $\text{CdCl}_3$ .



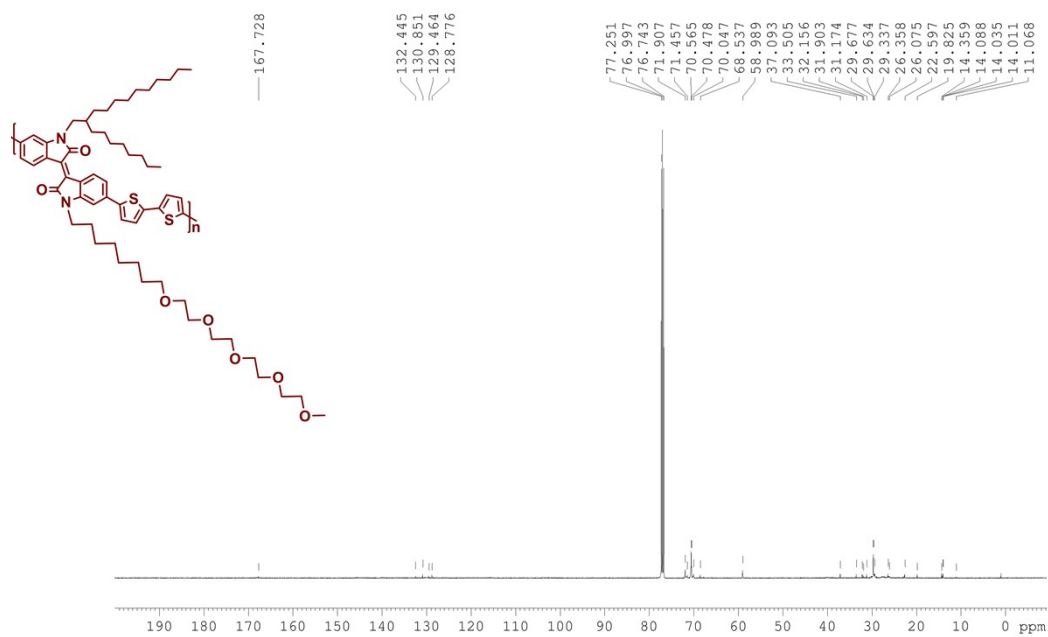

**Fig. S8.**  $^{13}\text{C}$  NMR spectrum of P(C,O) in  $\text{CdCl}_3$ .

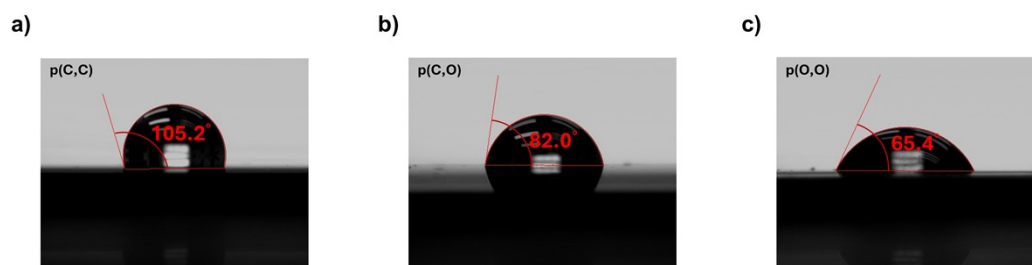

**Fig. S9.** Contact angle measurements of water droplets on the polymer films: (a) P(C,C), (b) P(C,O), and (c) P(O,O).

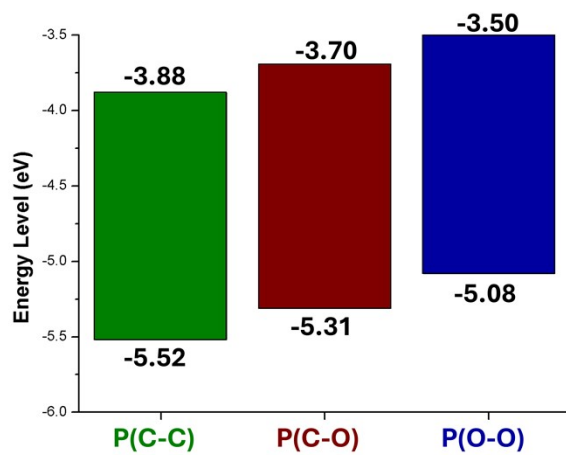

**Fig. S10.** Frontier energy level diagram of the polymers studied.

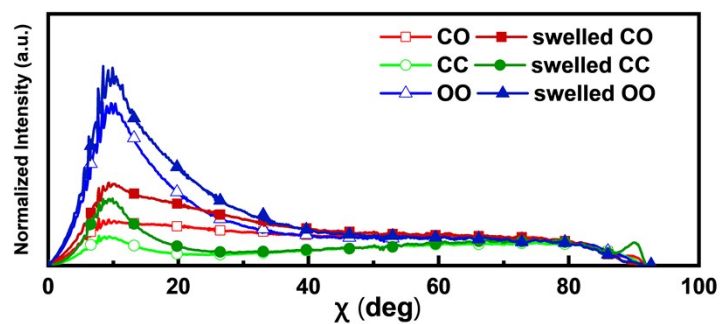

**Fig. S11.** Geometrically corrected pole figures of the polymer films derived from the azimuthal integral of their (100) diffractions in 2D GIXD patterns.

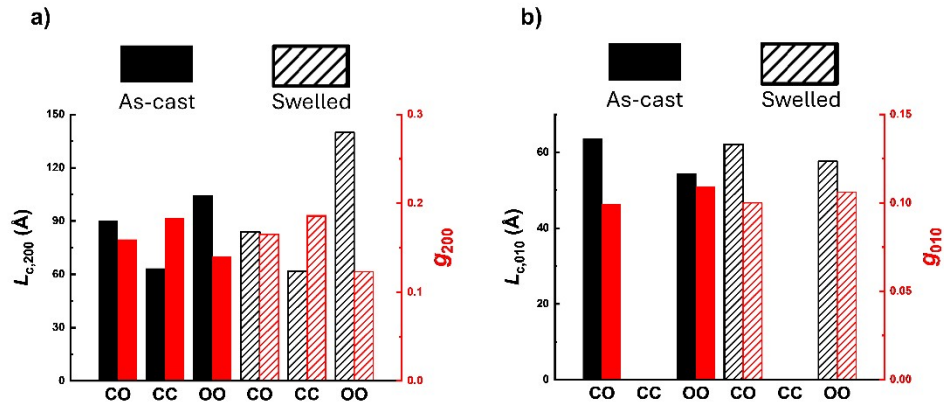

**Fig. S12.** Summary of the crystallographic parameters:  $L_c$  and  $g$  of (a) (200) diffractions and (b) (010) diffractions of the as-cast and electrolyte-swelled polymer films.

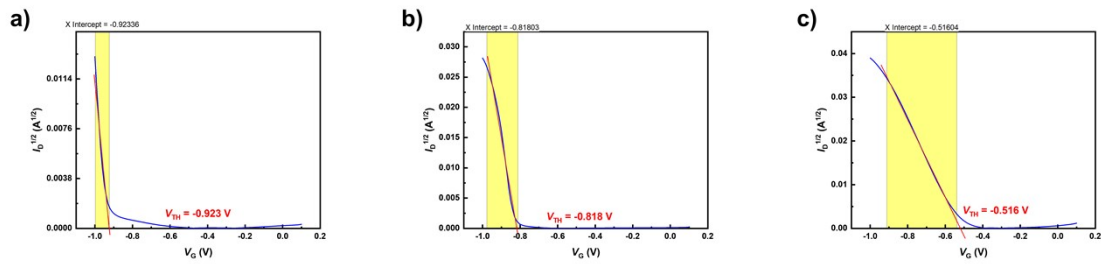

**Fig. S13.** The relationship of  $I_d^{1/2}$  vs.  $V_g$  of (a) P(C,C), (b) P(C,O), and (c) P(O,O) based OECT devices.

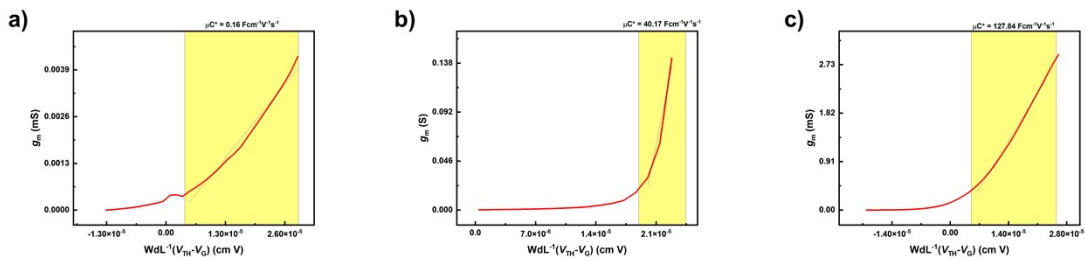

**Fig. S14.** The relationship of  $g_m$  vs.  $WdL^{-1}(V_{th} - V_g)$  of (a) p(C,C), (b) p(C,O), and (c) P(O,O) based OECT devices.

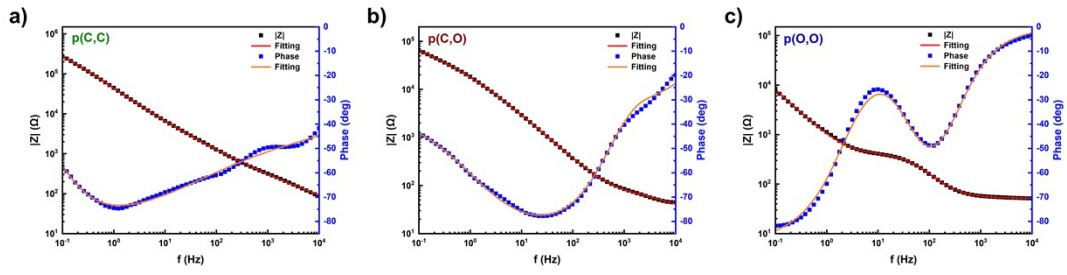

**Fig. S15.** Bode plots derived from the EIS characteristics of the polymer films: (a) P(C,C), (b) P(C,O), and (c) P(O,O).

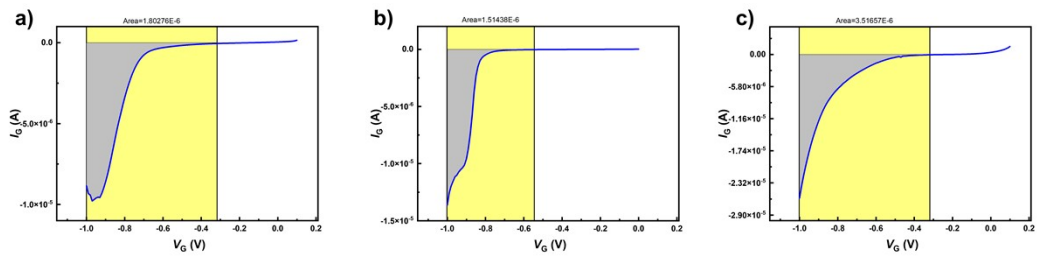

**Fig. S16.** The relationship of  $I_g$  vs.  $V_g$  of (a) P(C,C), (b) P(C,O), and (c) P(O,O) based OECT devices.

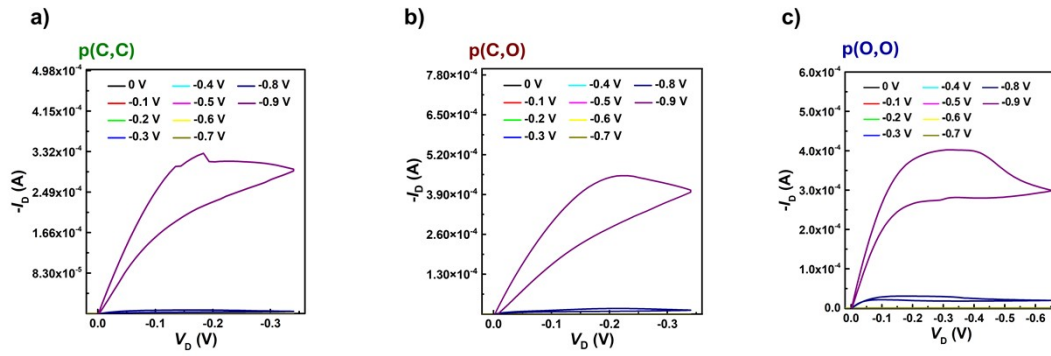

**Fig. S17.** Output characteristics of (a) P(C,C), (b) P(C,O), and (c) P(O,O) based OECD devices with a forward  $V_D$  sweeping from 0 to  $-0.3 \sim -0.6$  V at  $V_G = 0 \sim -0.9$  V.

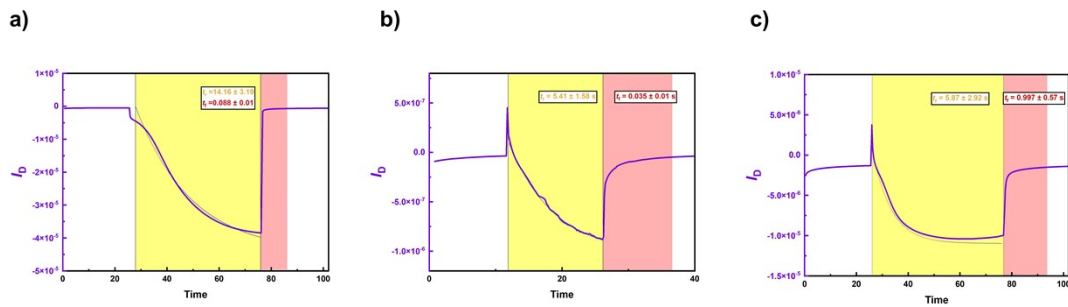

**Fig. S18.** Transient curves of (a) P(C,C), (b) P(C,O), and (c) P(O,O) based OECD devices. The x (time) and y ( $I_D$ ) axes are in units of [s] and [A]. The exponential fittings indicate their characteristic response time.

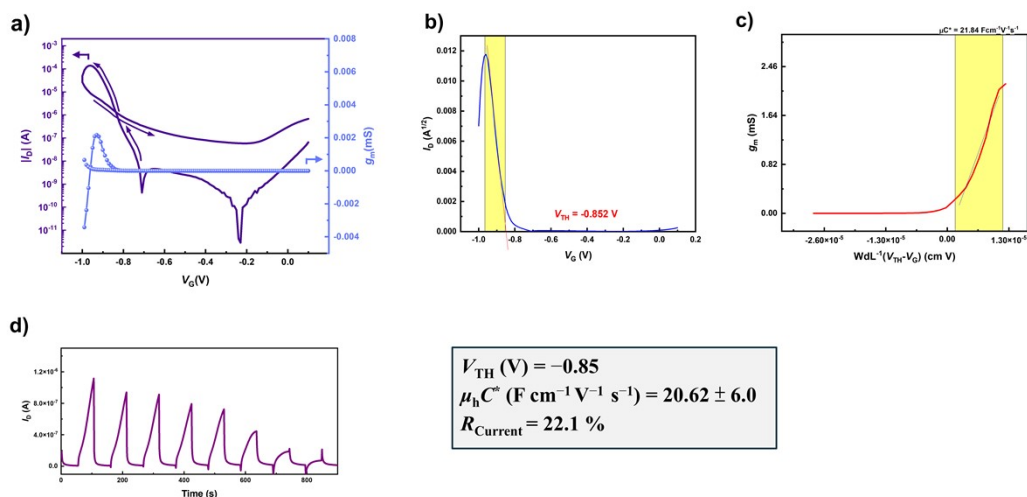

**Fig. S18.** OECT transfer characteristics of the reference device comprising the polymer blend of P(C,C) and P(O,O): (a) Transfer curve with a forward  $V_G$  sweeping from 0.1 to  $-1.0$  V at  $V_D = -0.3$  V. (b) The relationship of  $I_d^{1/2}$  vs.  $V_g$ . (c) The relationship of  $g_m$  vs.  $WdL^{-1}(V_{th} - V_g)$ . (d) Transient characteristics of the polymer films with  $V_G$  pulse of  $-0.85$  V at  $V_D = -0.3$  V for 8 cycles.
